# Supplementary material for: Sports Specialization and Sports-Related Injuries in Japanese School-Aged Children and Adolescents: A Retrospective Descriptive Study
Source: MDPI journal article supplement (doi:10.3390/ijerph18147369), 2021-07-09
Supplement: s1 [file s1]

**Table S2.** Number (%) of those with experience and those with injury in each sports item.

| Sports item                    | Those with experience, n (% <sup>a</sup> ) |       |           |       |           |       | Those with injury, n (% <sup>b</sup> ) |        |                |        |                              |                    |
|--------------------------------|--------------------------------------------|-------|-----------|-------|-----------|-------|----------------------------------------|--------|----------------|--------|------------------------------|--------------------|
|                                | Overall                                    |       | Male      |       | Female    |       | Overall                                |        | Male           |        | Female                       |                    |
|                                | (n = 486)                                  |       | (n = 227) |       | (n = 259) |       | (n = 262, 54%)                         |        | (n = 154, 68%) |        | (n = 108, 42% <sup>*</sup> ) |                    |
| 1 Swimming <sup>*c</sup>       | 189                                        | (39%) | 81        | (36%) | 108       | (42%) | 15                                     | (8%)   | 7              | (9%)   | 8                            | (7%)               |
| 2 Rubber Baseball              | 94                                         | (19%) | 91        | (40%) | 3         | (1%)  | 49                                     | (52%)  | 48             | (53%)  | 1                            | (33%)              |
| 3 Basketball                   | 84                                         | (17%) | 31        | (14%) | 53        | (20%) | 42                                     | (50%)  | 17             | (55%)  | 25                           | (47%)              |
| 4 Track and Field              | 77                                         | (16%) | 40        | (18%) | 37        | (14%) | 38                                     | (49%)  | 22             | (55%)  | 16                           | (43%)              |
| 5 Soft Tennis                  | 76                                         | (16%) | 25        | (11%) | 51        | (20%) | 14                                     | (18%)  | 7              | (28%)  | 7                            | (14%)              |
| 6 Tennis                       | 68                                         | (14%) | 32        | (14%) | 36        | (14%) | 14                                     | (21%)  | 11             | (34%)  | 3                            | (8% <sup>*</sup> ) |
| 7 Volleyball                   | 64                                         | (13%) | 18        | (8%)  | 46        | (18%) | 33                                     | (52%)  | 11             | (61%)  | 22                           | (48%)              |
| 8 Football                     | 62                                         | (13%) | 55        | (24%) | 7         | (3%)  | 21                                     | (34%)  | 20             | (36%)  | 1                            | (14%)              |
| 9 Baseball                     | 56                                         | (12%) | 55        | (24%) | 1         | (0%)  | 36                                     | (64%)  | 36             | (65%)  | 0                            | (0%)               |
| 10 Softball                    | 50                                         | (10%) | 23        | (10%) | 27        | (10%) | 18                                     | (36%)  | 7              | (30%)  | 11                           | (41%)              |
| 11 Table Tennis                | 44                                         | (9%)  | 16        | (7%)  | 28        | (11%) | 6                                      | (14%)  | 2              | (13%)  | 4                            | (14%)              |
| 12 Badminton                   | 38                                         | (8%)  | 8         | (4%)  | 30        | (12%) | 8                                      | (21%)  | 3              | (38%)  | 5                            | (17%)              |
| 13 Dance Sport                 | 35                                         | (7%)  | 6         | (3%)  | 29        | (11%) | 14                                     | (40%)  | 2              | (33%)  | 12                           | (41%)              |
| 14 Gymnastics                  | 27                                         | (6%)  | 14        | (6%)  | 13        | (5%)  | 6                                      | (22%)  | 1              | (7%)   | 5                            | (38%)              |
| 15 Karatedo                    | 25                                         | (5%)  | 15        | (7%)  | 10        | (4%)  | 8                                      | (32%)  | 6              | (40%)  | 2                            | (20%)              |
| 16 Handball                    | 21                                         | (4%)  | 12        | (5%)  | 9         | (3%)  | 10                                     | (48%)  | 7              | (58%)  | 3                            | (33%)              |
| 17 Kendo                       | 20                                         | (4%)  | 8         | (4%)  | 12        | (5%)  | 6                                      | (30%)  | 3              | (38%)  | 3                            | (25%)              |
| 18 Rhythmic Gymnastics         | 19                                         | (4%)  | 1         | (0%)  | 18        | (7%)  | 1                                      | (5%)   | 0              | (0%)   | 1                            | (6%)               |
| 19 Kyudo                       | 15                                         | (3%)  | 4         | (2%)  | 11        | (4%)  | 3                                      | (20%)  | 2              | (50%)  | 1                            | (9%)               |
| 20 Judo                        | 9                                          | (2%)  | 8         | (4%)  | 1         | (0%)  | 4                                      | (44%)  | 3              | (38%)  | 1                            | (100%)             |
| 21 Ballet                      | 8                                          | (2%)  | 0         | (0%)  | 8         | (3%)  | 2                                      | (25%)  | 0              | —      | 2                            | (25%)              |
| 22 Dodgeball                   | 7                                          | (1%)  | 4         | (2%)  | 3         | (1%)  | 4                                      | (57%)  | 3              | (75%)  | 1                            | (33%)              |
| 23 Rugby Football              | 5                                          | (1%)  | 5         | (2%)  | 0         | (0%)  | 4                                      | (80%)  | 4              | (80%)  | 0                            | —                  |
| 24 Baton Twirling              | 5                                          | (1%)  | 0         | (0%)  | 5         | (2%)  | 0                                      | (0%)   | 0              | —      | 0                            | (0%)               |
| 25 Rowing                      | 3                                          | (1%)  | 2         | (1%)  | 1         | (0%)  | 0                                      | (0%)   | 0              | (0%)   | 0                            | (0%)               |
| 26 American Football           | 2                                          | (0%)  | 2         | (1%)  | 0         | (0%)  | 2                                      | (100%) | 2              | (100%) | 0                            | —                  |
| Others (5 items) <sup>*d</sup> | 5                                          | (1%)  | 0         | (0%)  | 5         | (2%)  | 2                                      | (40%)  | 0              | —      | 2                            | (40%)              |

<sup>a</sup>: Percentages are proportions of those with experience to the overall, male, and female participants. <sup>b</sup>: Percentages are proportions of those with injury to those with experience. <sup>c</sup>: The most popular pair of sports experienced by the participants was swimming and basketball ( $n = 40$ ), followed by a pair of swimming and tennis ( $n = 33$ ) and pairs of swimming and track and field/rubber-ball baseball ( $n = 32$ , respectively). <sup>d</sup>: Cycling ( $n = 2$ ), Aikido ( $n = 1$ ), Fencing ( $n = 1$ ), Figure Skating ( $n = 1$ ), Wrestling ( $n = 1$ ). <sup>\*</sup>: Significantly different from male participants.
