# Supplementary material for: Sports Specialization and Sports-Related Injuries in Japanese School-Aged Children and Adolescents: A Retrospective Descriptive Study
Source: MDPI journal article supplement (doi:10.3390/ijerph18147369), 2021-07-09
Supplement: s1 [file s1]

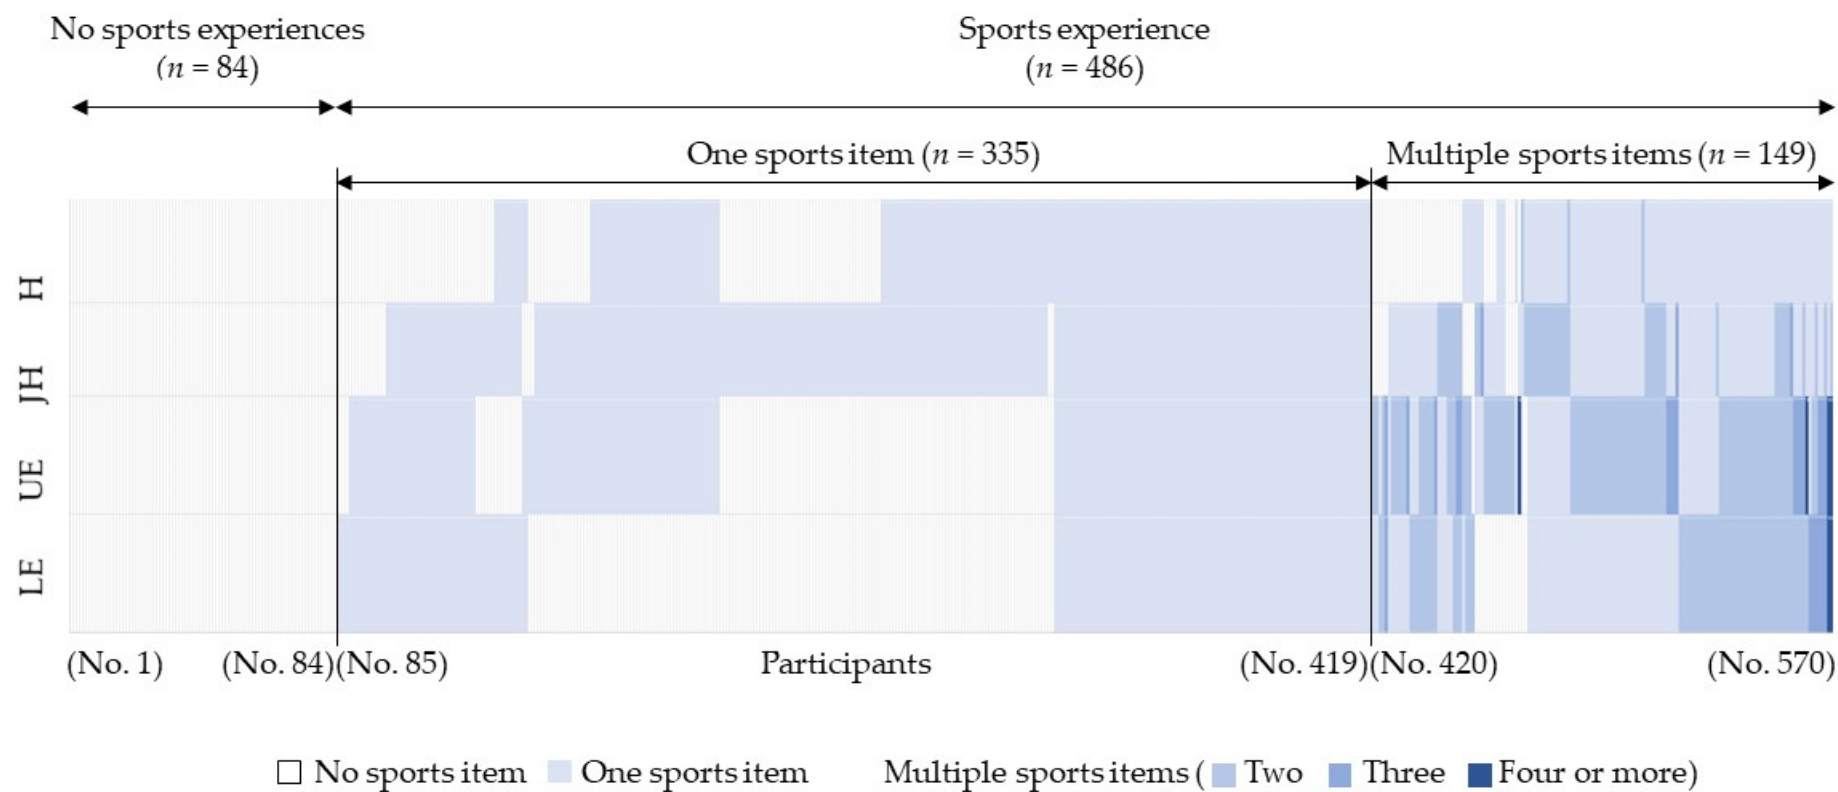

LH: Lower Elementary School; UE: Upper Elementary School; JH: Junior High School; H: High School. The horizontal line means the study participants ( $n = 570$ ) arranged to show 59% ( $n = 335$ ) adopted in only one sports item in a certain school category (from No. 85 to 419).

**Figure S1.** Number of sports items adopted by each participant in each school category.
